# Supplementary material
Source: PubMed Central journal article supplement (PMC6363339)

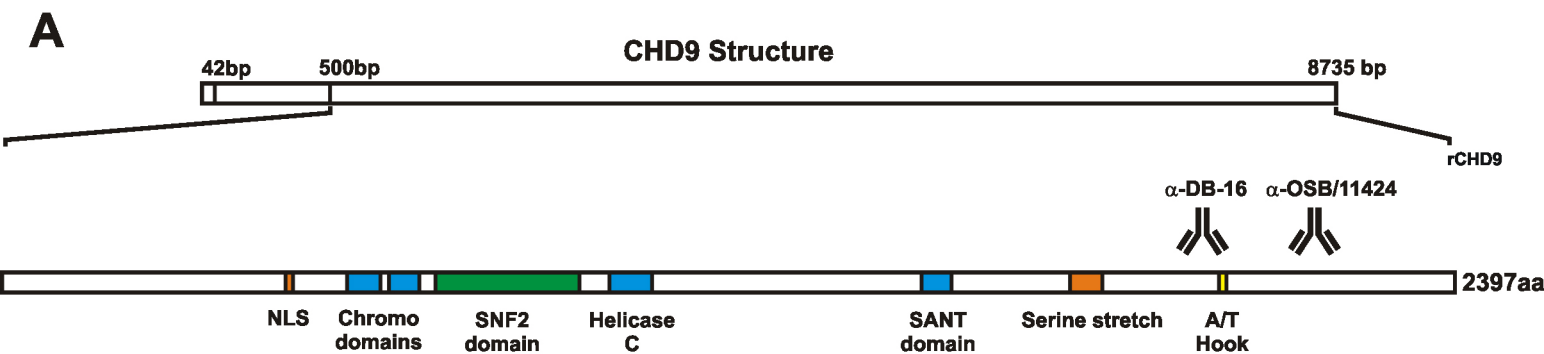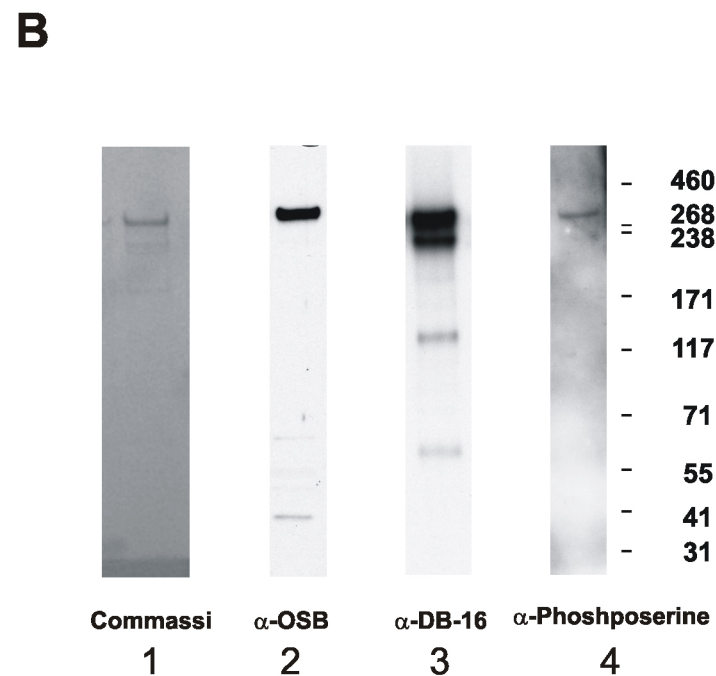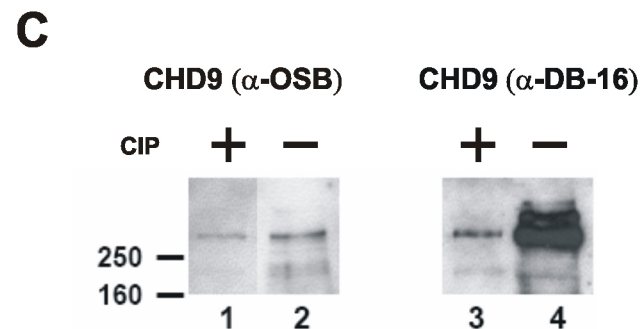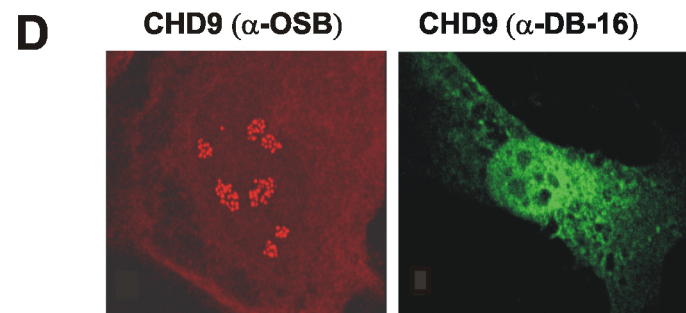

**A**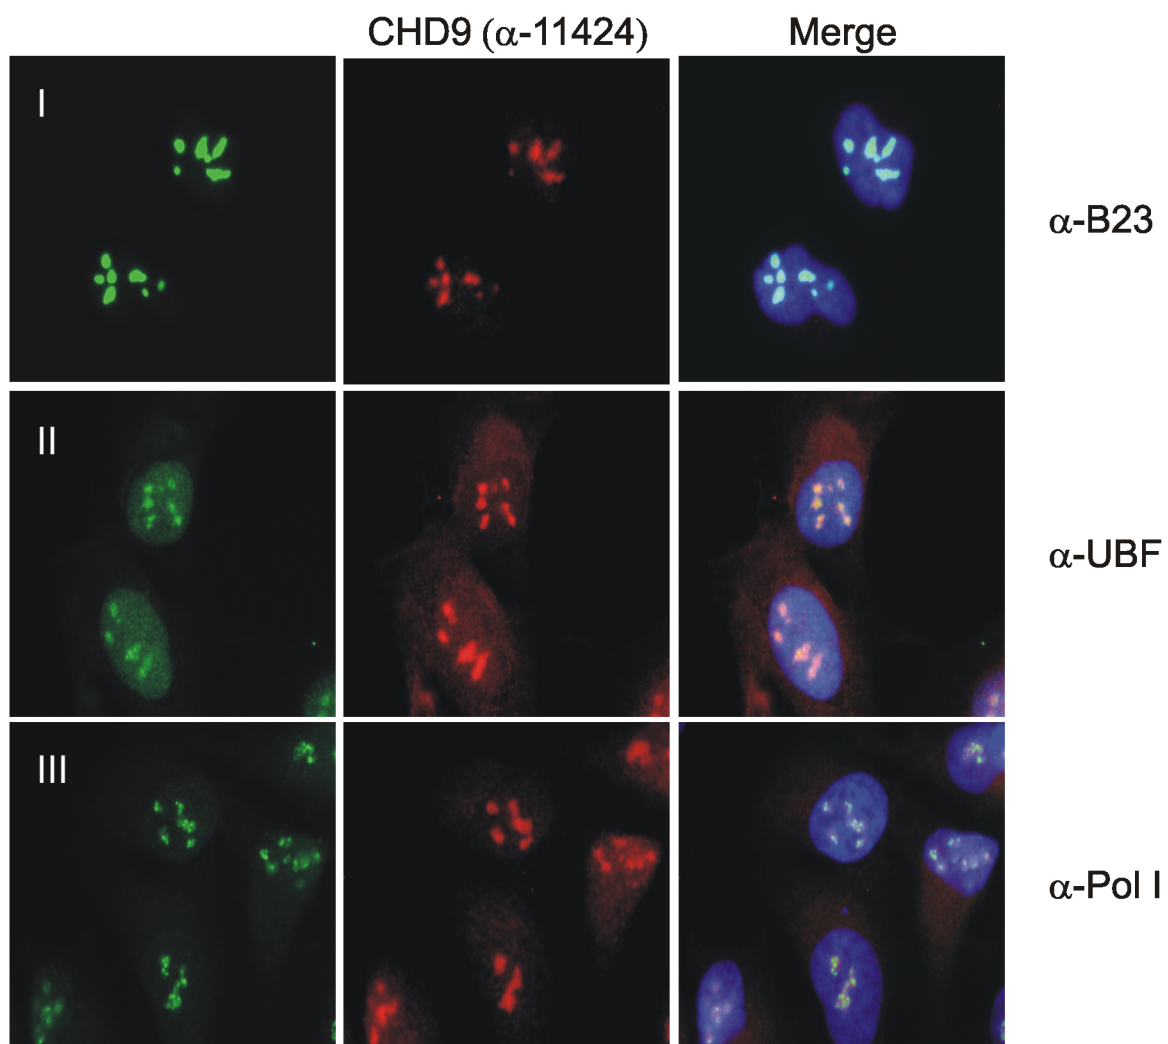**B**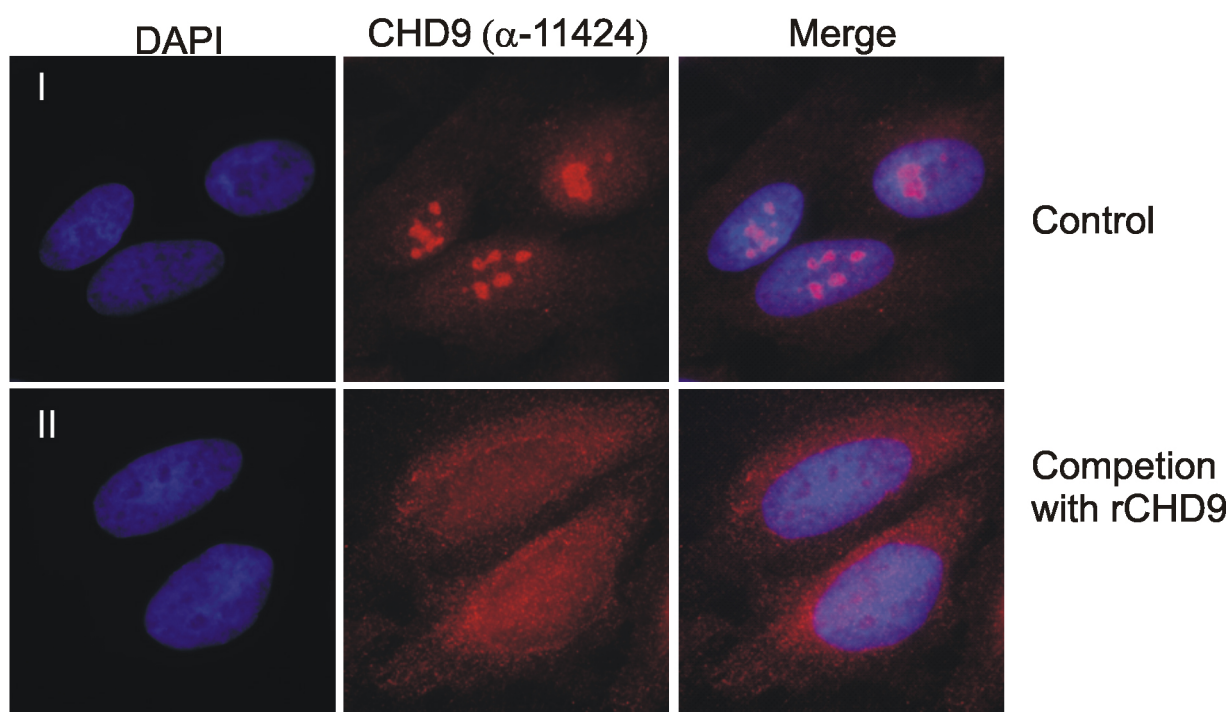

Supplement: NIHMS1002999-supplement-Supp_Figures1-2.pdf [file NIHMS1002999-supplement-Supp_Figures1-2.pdf]
